# Supplementary material
Source: PubMed Central journal article supplement (PMC6582640)
Supplement: NIHMS1514462-supplement-1.pdf [file NIHMS1514462-supplement-1.pdf]

Figure E1

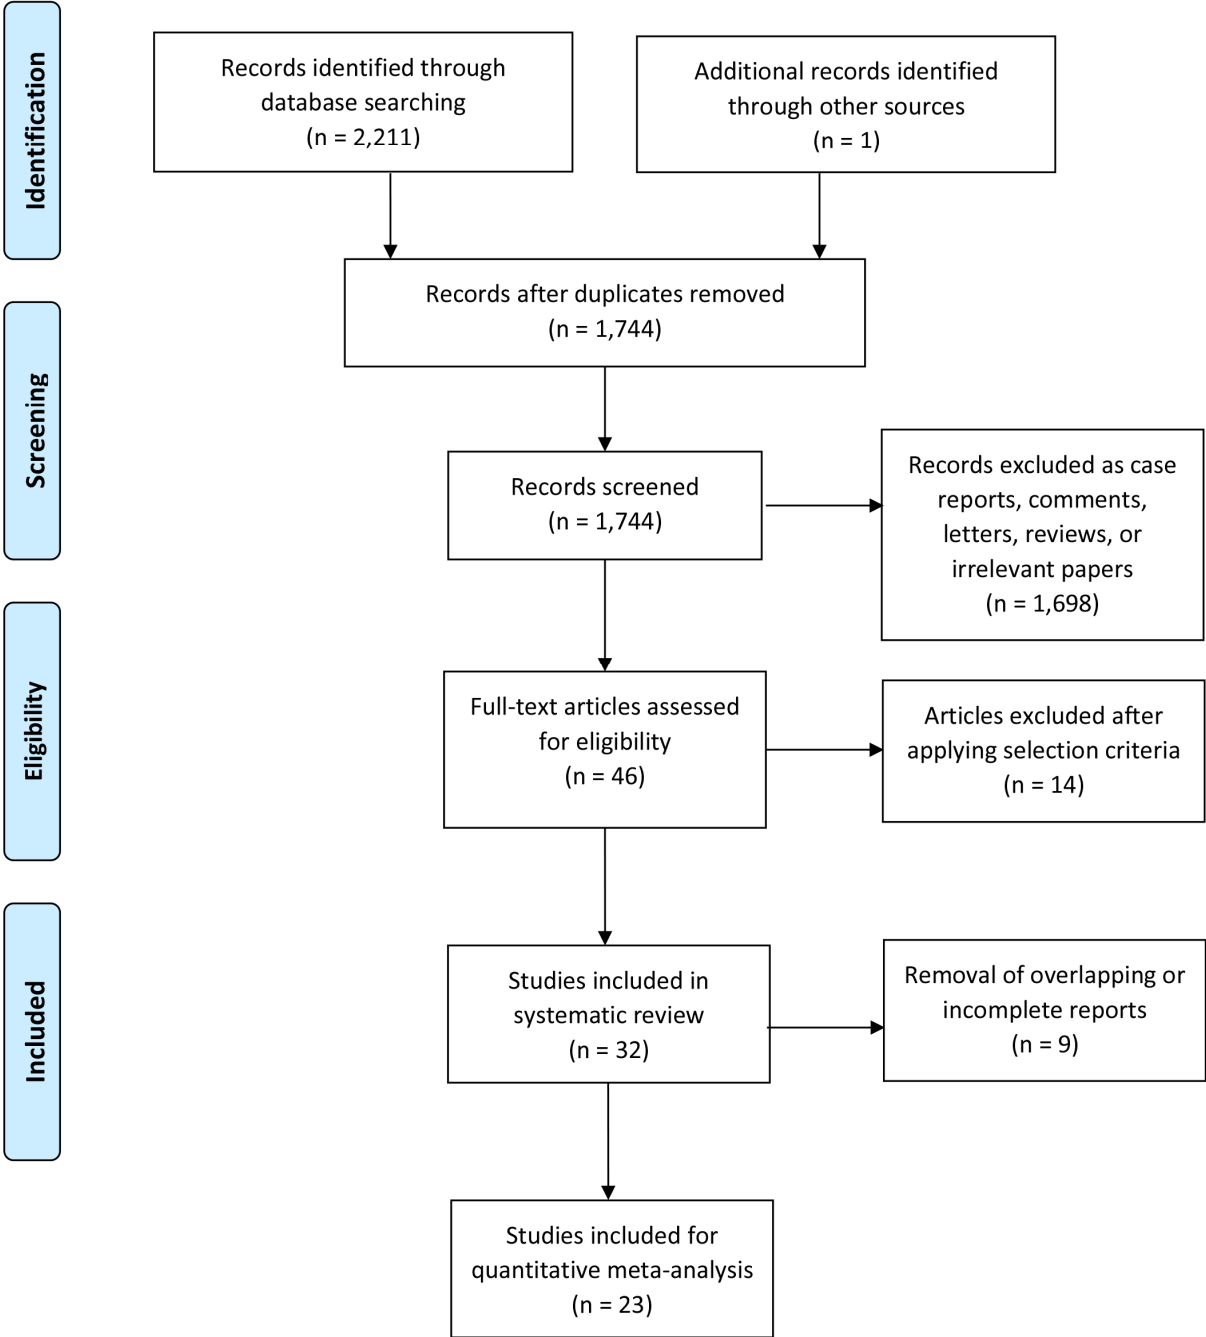

Figure E2

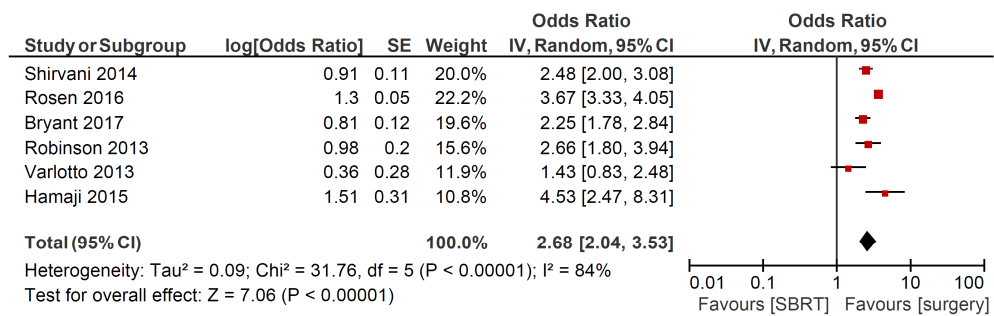

Figure E3

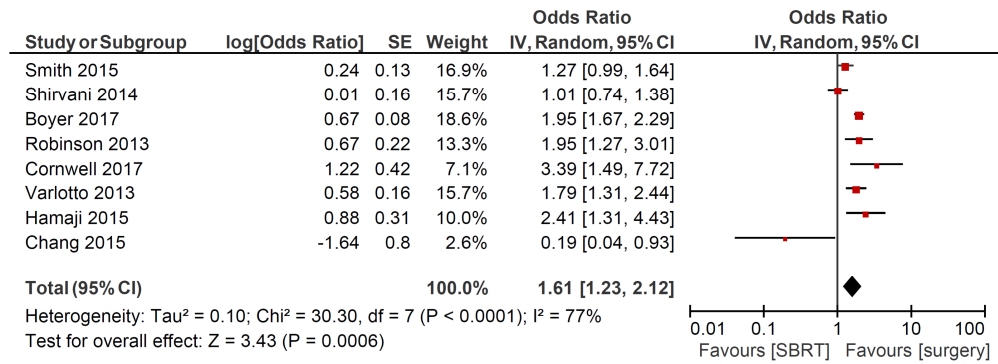

Figure E4

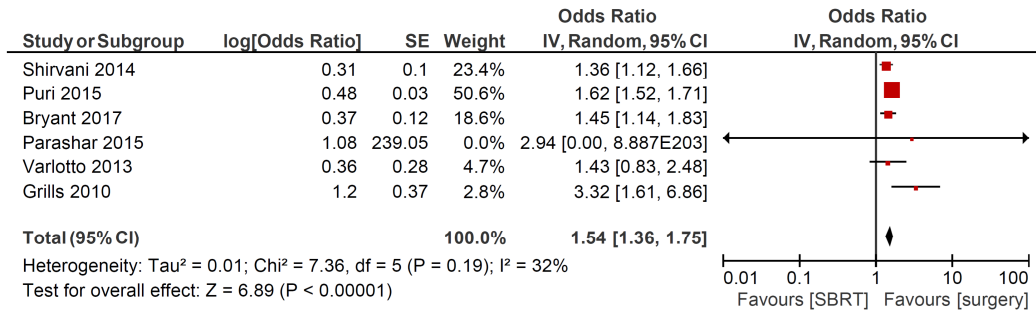

Figure E5

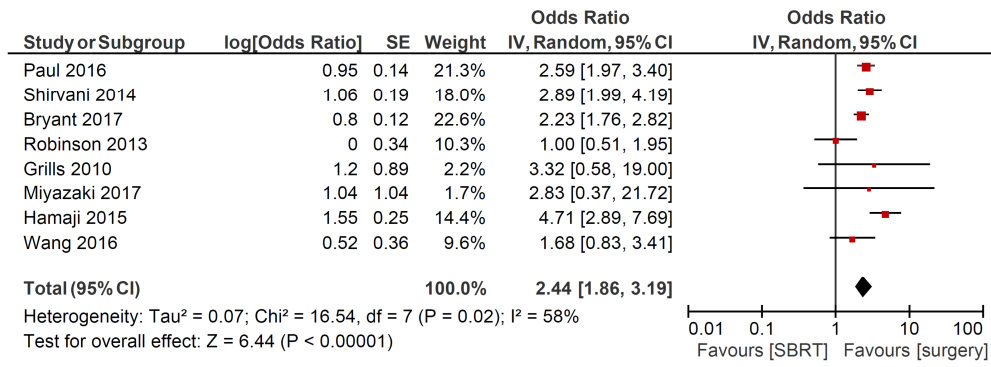

Figure E6

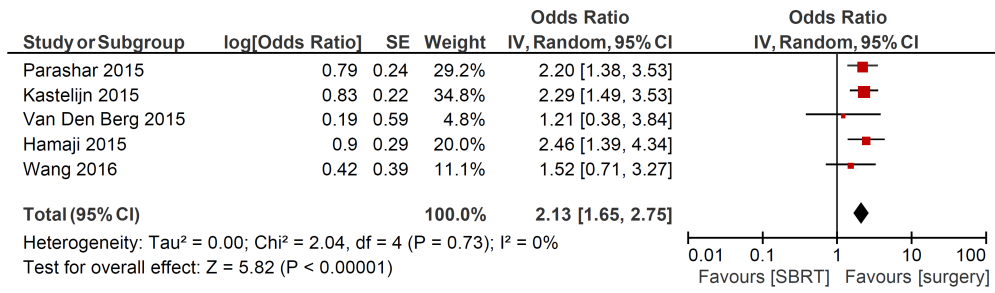

Figure E7

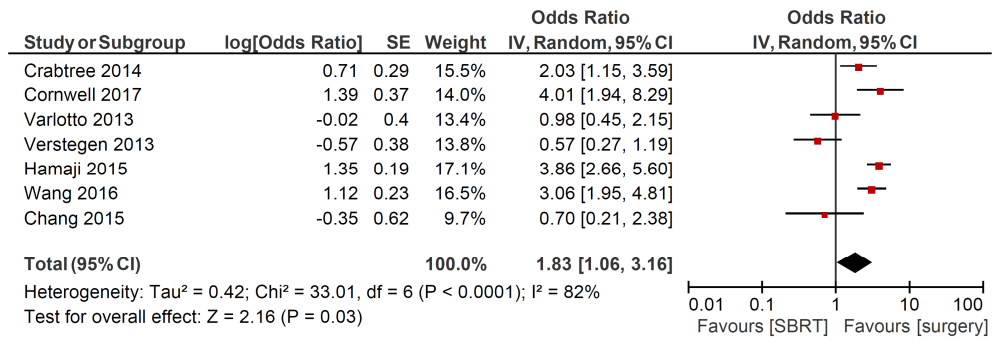

Figure E8

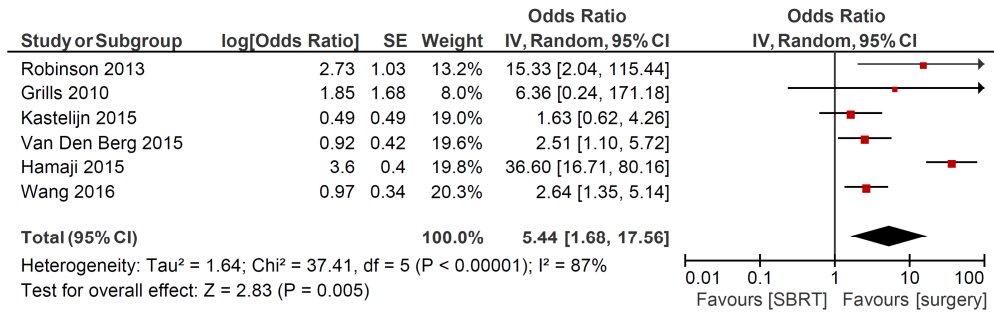



Figure E9

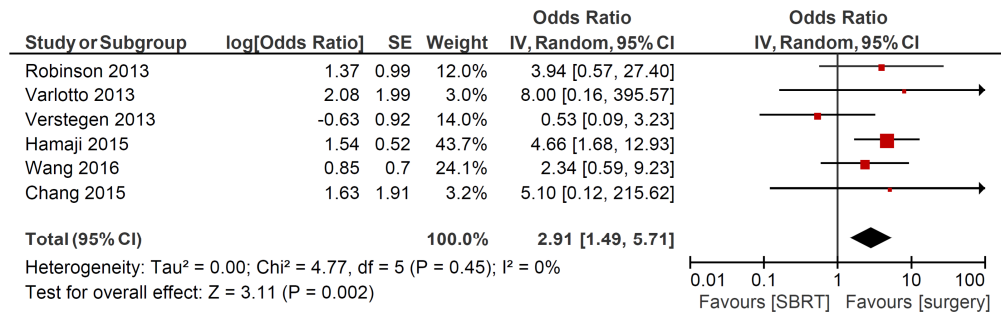

Supplementary Table 1. Summary of baseline patient characteristics and treatment details of unmatched patients who underwent stereotactic body radiation therapy (SBRT) or surgical resection for early-stage non-small cell lung cancer in studies selected for meta-analysis

| Authors                    | Median Age      |                 | Females (%) |                                    | Treatment Regimen |           |                    |          |               |                                                   |      |      |
|----------------------------|-----------------|-----------------|-------------|------------------------------------|-------------------|-----------|--------------------|----------|---------------|---------------------------------------------------|------|------|
|                            | SBRT            | Sx              | SBRT        | Sx                                 | SBRT              |           | Resection Type (%) |          |               | Technique (%)                                     |      |      |
|                            |                 |                 |             |                                    | Total Gys         | Fractions | Lobectomy          | Sublobar |               | Other                                             | VATS | Open |
|                            |                 |                 |             |                                    |                   |           |                    | Wedge    | Segmentectomy |                                                   |      |      |
| Paul <sup>14</sup>         | 79 <sup>M</sup> | 79 <sup>M</sup> | 61          | 61                                 | NR                | NR        | 71                 | 25       | 4             | 0                                                 | 100  | 0    |
| Smith <sup>15</sup>        | NR              | NR              | NR          | NR                                 | NR                | NR        | 83                 | 17       |               | 0                                                 | NR   | NR   |
| Shirvani <sup>18</sup>     | NS              | NS              | 63          | 53 <sup>L</sup><br>54 <sup>S</sup> | NR                | NR        | 83                 | 17       |               | 0                                                 | NR   | NR   |
| Rosen <sup>21</sup>        | 76 <sup>M</sup> | 67 <sup>M</sup> | 57          | 55                                 | NR                | 3-5       | 100                | 0        | 0             | 0                                                 | NR   | NR   |
| Puri <sup>22</sup>         | 75              | 68              | 55          | 55                                 | 47-61             | NR        | 74                 | 24       |               | 2 <sup>P</sup>                                    | NR   | NR   |
| Boyer <sup>23</sup>        | 72 <sup>M</sup> | 67 <sup>M</sup> | 1           | 3                                  | NR                | NR        | 75                 | 20       |               | 3 <sup>P</sup>                                    | 14   | 86   |
| Bryant <sup>24</sup>       | NR              | NR              | 3           | 4                                  | NR                | NR        | 82                 | 18       |               | 0                                                 | NR   | NR   |
| Crabtree <sup>25</sup>     | 74 <sup>M</sup> | 66 <sup>M</sup> | 47          | 54                                 | 45-60             | 3-6       | 76                 | 11       | 7             | 4 <sup>P</sup> 2 <sup>B</sup>                     | NR   | NR   |
| Robinson <sup>26</sup>     | 76              | 66              | 44          | 46                                 | 45-54             | 3-5       | 91                 | 0        | 0             | 3 <sup>B</sup> 6 <sup>P</sup>                     | 14   | 86   |
| Cornwell <sup>31</sup>     | 70              | 64              | 2           | 8                                  | NR                | 4-5       | 100                | 0        | 0             | 0                                                 | 100  | 0    |
| Varlotto <sup>32</sup>     | 73              | 69              | 52          | 43                                 | 48-60             | 3-5       | 73                 | 27       |               | 0                                                 | NR   | NR   |
| Grills <sup>33</sup>       | 78              | 74              | 60          | 62                                 | 48-60             | 4-5       | 0                  | 100      | 0             | 0                                                 | 52   | 48   |
| Kastelijin <sup>34</sup>   | 72 <sup>M</sup> | 67 <sup>M</sup> | 64          | 38                                 | 54-60             | 3-8       | 80                 | 3        | 0             | 5 <sup>B</sup> 10 <sup>P</sup><br>2 <sup>SV</sup> | 41   | 59   |
| Verstegen <sup>35</sup>    | NR              | NR              | NR          | NR                                 | NR                | NR        | NR                 | NR       | NR            | NR                                                | NR   | NR   |
| Mokhles <sup>37</sup>      | 74              | 65              | 35          | 34                                 | 45-60             | 5-20      | 76                 | 3        | 0             | 7 <sup>B</sup> 14 <sup>P</sup>                    | NR   | NR   |
| van den Berg <sup>38</sup> | 77              | 67              | 27          | 33                                 | 60                | 3-12      | 77                 | 12       | 0             | 8 <sup>B</sup> 3 <sup>P</sup>                     | 6    | 94   |
| Palma <sup>39</sup>        | NS              | NS              | 29          | 29                                 | 32-60             | 2-8       | NR                 | NR       | NR            | NR                                                | NR   | NR   |
| Miyazaki <sup>40</sup>     | 82              | 83              | 29          | 30                                 | 48-60             | 4-10      | 60                 | 21       | 19            | 0                                                 | NR   | NR   |
| Hamaji <sup>41</sup>       | 77              | 66              | 28          | 43                                 | 48-60             | 4-8       | 100                | 0        | 0             | 0                                                 | 100  | 0    |
| Nakagawa <sup>43</sup>     | 80 <sup>M</sup> | 78 <sup>M</sup> | 29          | 33                                 | 48-60             | 4-8       | 84                 | 2        | 13            | 1 <sup>P</sup>                                    | NR   | NR   |

|                    |                 |                 |    |   |       |     |    |    |   |    |    |
|--------------------|-----------------|-----------------|----|---|-------|-----|----|----|---|----|----|
| Wang <sup>44</sup> | 83 <sup>M</sup> | 73 <sup>M</sup> | 12 | 8 | 54-60 | 3-8 | 60 | 40 | 0 | 51 | 49 |
|--------------------|-----------------|-----------------|----|---|-------|-----|----|----|---|----|----|

B, bilobectomy; L, lobectomy; M, mean value; NR, not reported; P, pneumonectomy; S, sublobar; Sx, surgery; VATS; video-assisted thoracoscopic surgery.

Supplementary Table 2. Summary of histopathological and clinical staging details of unmatched patients who underwent stereotactic body radiation therapy (SBRT) or surgical resection for early-stage non-small cell lung cancer in studies selected for meta-analysis

| Author                     | Histopathology – SBRT (%) |    |    |    | Histopathology – Surgery (%)       |                                    |                                   |                                   | Clinical Stage – SBRT (%) |    |     |           | Clinical Stage – Surgery (%)       |                                    |     |          |
|----------------------------|---------------------------|----|----|----|------------------------------------|------------------------------------|-----------------------------------|-----------------------------------|---------------------------|----|-----|-----------|------------------------------------|------------------------------------|-----|----------|
|                            | A                         | Sq | O  | U  | A                                  | Sq                                 | O                                 | U                                 | IA                        | IB | IIA | IIB/III A | IA                                 | IB                                 | IIA | IIB/IIIA |
| Paul <sup>14</sup>         | 49                        | 43 | 8  | 0  | 49                                 | 27                                 | 24                                | 0                                 | 70                        | 30 | 0   | 0         | 67                                 | 33                                 | 0   | 0        |
| Smith <sup>15</sup>        | NR                        | NR | NR | NR | NR                                 | NR                                 | NR                                | NR                                | NR                        | NR | NR  | NR        | NR                                 | NR                                 | NR  | NR       |
| Shirvani <sup>18</sup>     | 47                        | 26 | 27 | 0  | 58 <sup>S</sup><br>61 <sup>L</sup> | 32 <sup>S</sup><br>31 <sup>L</sup> | 10 <sup>S</sup><br>8 <sup>L</sup> | 0                                 | 80                        | 20 | 0   | 0         | 77 <sup>S</sup><br>88 <sup>L</sup> | 23 <sup>S</sup><br>12 <sup>L</sup> | 0   | 0        |
| Rosen <sup>21</sup>        | 48                        | 33 | 19 | 0  | 69                                 | 26                                 | 5                                 | 0                                 | 77                        | 23 | 0   | 0         | 70                                 | 30                                 | 0   | 0        |
| Puri <sup>22</sup>         | NR                        | NR | NR | NR | NR                                 | NR                                 | NR                                | NR                                | 76                        | 24 | 0   | 0         | 72                                 | 28                                 | 0   | 0        |
| Boyer <sup>23</sup>        | 24                        | 42 | 26 | 9  | 50                                 | 38                                 | 10                                | 2                                 | 51                        | 49 | 0   | 0         | 55                                 | 45                                 | 0   | 0        |
| Bryant <sup>24</sup>       | 39                        | 45 | 0  | 16 | 58 <sup>S</sup><br>57 <sup>L</sup> | 33 <sup>S</sup><br>32 <sup>L</sup> | NS                                | 9 <sup>S</sup><br>11 <sup>L</sup> | 81                        | 19 | 0   | 0         | 88 <sup>S</sup><br>73 <sup>L</sup> | 11 <sup>S</sup><br>27 <sup>L</sup> | 0   | 0        |
| Crabtree <sup>25</sup>     | NR                        | NR | NR | NR | NR                                 | NR                                 | NR                                | NR                                | 73                        | 27 | 0   | 0         | 59                                 | 36                                 | 3   | 2        |
| Robinson <sup>26</sup>     | 46                        | 32 | 21 | 1  | 59                                 | 34                                 | 3                                 | 4                                 | 72                        | 24 | 4   | 0         | 53                                 | 32                                 | 9   | 6        |
| Cornwell <sup>31</sup>     | 43                        | 41 | 16 | 0  | 65                                 | 26                                 | 9                                 | 0                                 | 75                        | 25 | 0   | 0         | 74                                 | 26                                 | 0   | 0        |
| Varlotto <sup>32</sup>     | 28                        | 28 | 43 | 0  | 61                                 | 31                                 | 8                                 | 0                                 | 100                       | 0  | 0   | 0         | 100                                | 0                                  | 0   | 0        |
| Grills <sup>33</sup>       | 62                        | 33 | 0  | 5  | 65                                 | 25                                 | 10                                | 0                                 | 71                        | 29 | 0   | 0         | 81                                 | 19                                 | 0   | 0        |
| Kastelijn <sup>34</sup>    | 9                         | 9  | 12 | 70 | 59                                 | 33                                 | 8                                 | 0                                 | 72                        | 14 | 7   | 7         | 53                                 | 21                                 | 14  | 12       |
| Verstegen <sup>35</sup>    | NR                        | NR | NR | NR | NR                                 | NR                                 | NR                                | NR                                | NR                        | NR | NR  | NR        | NR                                 | NR                                 | NR  | NR       |
| Mokhles <sup>37</sup>      | 10                        | 11 | 19 | 60 | 40                                 | 36                                 | 24                                | 0                                 | 53                        | 35 | 11  | 1         | 45                                 | 26                                 | 19  | 10       |
| Van Den Berg <sup>38</sup> | NR                        | NR | NR | NR | NR                                 | NR                                 | NR                                | NR                                | 64                        | 36 | 0   | 0         | 58                                 | 42                                 | 0   | 0        |
| Palma <sup>39</sup>        | NR                        | NR | NR | NR | NR                                 | NR                                 | NR                                | NR                                | 90                        | 10 | 0   | 0         | 39                                 | 61                                 | 0   | 0        |
| Miyazaki <sup>40</sup>     | 32                        | 22 | 0  | 46 | 70                                 | NR                                 | NR                                | NR                                | 80                        | 20 | 0   | 0         | 72                                 | 28                                 | 0   | 0        |
| Hamaji <sup>41</sup>       | 52                        | 33 | 15 | 0  | 74                                 | 17                                 | 9                                 | 0                                 | 72                        | 28 | 0   | 0         | 71                                 | 29                                 | 0   | 0        |
| Nakagawa <sup>43</sup>     | 54                        | 34 | 11 | 0  | 60                                 | 34                                 | 7                                 | 0                                 | 80                        | 20 | 0   | 0         | 75                                 | 25                                 | 0   | 0        |
| Wang <sup>44</sup>         | 38                        | 46 | 3  | 13 | 73                                 | 23                                 | 4                                 | 0                                 | 100                       | 0  | 0   | 0         | 100                                | 0                                  | 0   | 0        |

A, adenocarcinoma; L, lobectomy; NR, not reported; O, other type of non-small cell lung cancer; Sq, squamous cell carcinoma; S, sublobar; U, undefined.

Supplementary Table 3: Summary of perioperative morbidity and mortality outcomes in matched patients who underwent stereotactic body radiation therapy (SBRT) or surgical resection for early-stage non-small cell lung cancer in studies selected for meta-analysis

| Author                  | Mortality (%) |         | Surgical Morbidity (%) |           |    |                    |    | SBRT Morbidity (%) |             |            |         |
|-------------------------|---------------|---------|------------------------|-----------|----|--------------------|----|--------------------|-------------|------------|---------|
|                         | SBRT          | Surgery | Air Leak               | Pneumonia | PE | Cardiac Arrhythmia | MI | Rib #              | Pneumonitis | Chest Pain | Fatigue |
| Paul <sup>14</sup>      | NR            | NR      | NR                     | NR        | NR | NR                 | NR | NR                 | NR          | NR         | NR      |
| Smith <sup>15</sup>     | NR            | NR      | NR                     | NR        | NR | NR                 | NR | NR                 | NR          | NR         | NR      |
| Shirvani <sup>18</sup>  | NR            | NR      | NR                     | NR        | NR | NR                 | NR | NR                 | NR          | NR         | NR      |
| Rosen <sup>21</sup>     | NR            | 3       | NR                     | NR        | NR | NR                 | NR | NR                 | NR          | NR         | NR      |
| Puri <sup>22</sup>      | NR            | 3       | NR                     | NR        | NR | NR                 | NR | NR                 | NR          | NR         | NR      |
| Boyer <sup>23</sup>     | NR            | NR      | NR                     | NR        | NR | NR                 | NR | NR                 | NR          | NR         | NR      |
| Crabtree <sup>25</sup>  | NR            | NR      | NR                     | NR        | NR | NR                 | NR | NR                 | NR          | NR         | NR      |
| Robinson <sup>26</sup>  | 0             | NR      | NR                     | NR        | NR | NR                 | NR | NR                 | NR          | NR         | NR      |
| Cornwell <sup>31</sup>  | 0             | 0       | 0                      | 0         | 0  | 5                  | 0  | 0                  | 8           | 11         | 0       |
| Varlotto <sup>32</sup>  | NR            | NR      | NR                     | NR        | NR | NR                 | NR | NR                 | NR          | NR         | NR      |
| Kastelijn <sup>34</sup> | NR            | NR      | NR                     | NR        | NR | NR                 | NR | NR                 | NR          | NR         | NR      |
| Verstegen <sup>35</sup> | 0             | 2       | 0                      | 0         | 0  | 0                  | 0  | 0                  | 2           | 1          | 0       |
| Palma <sup>39</sup>     | 2             | 8       | NR                     | NR        | NR | NR                 | NR | NR                 | NR          | NR         | NR      |
| Miyazaki <sup>40</sup>  | NR            | 0       | NR                     | NR        | NR | NR                 | NR | NR                 | NR          | NR         | NR      |
| Hamaji <sup>41</sup>    | 0             | 0       | NR                     | NR        | NR | NR                 | NR | NR                 | NR          | NR         | NR      |
| Wang <sup>44</sup>      | NR            | NR      | NR                     | NR        | NR | NR                 | NR | NR                 | NR          | NR         | NR      |
| Chang <sup>7</sup>      | 0             | 4       | 0                      | 7         | 0  | 4                  | 0  | 3                  | NR          | NR         | 3       |

#, fracture; MI, myocardial infarction; NR, not reported; PE, pulmonary embolism.



#, fracture; MI, myocardial infarction; NR, not reported; PE, pulmonary embolism.
